# Supplementary material for: A Review Update on Gender Dysphoria and ASD and Response to Corrections
Source: Springer Nature journal article supplement (doi:10.1007/s10803-018-3863-8), 2018-12-14
Supplement: MOESM1 [file 16344754]

## Sheet: ALL
ID	AUTHORS	YEAR	TITLE	JOURNAL	DOI	METHOD AND STUDY DESIGN	MAIN FOCUS	TOTAL PARTICIPANTS	AGE GROUP IN FOCUS	MAIN FIELD/PERSPECTIVE	Participant COUNTRY	STUDY COUNTRY OF ORIGIN	QUANTITATIVE/QUALITATIVE
Original Review 05.04.2018
	Abelson	1981	The development of gender identity in the autistic child	Child: Care, Health and Development	http://dx.doi.org/10.1111/j.1365-2214.1981.tb00851.x	Cohort study	Gender identity in children with Autism	30 (27 male 3 Female)	3 to 11.5 years	Psychological	USA	USA	Quantitative
	Akgul et al.	2018	Autistic traits and executive functions in children and adolescents with gender dysphoria	Journal of Sex & Marital Therapy	https://dx.doi.org/10.1080/0092623X.2018.1437489	Case-control study	Autistic traits and executive functions in children and adolescents with GD	75 (39 male 36 female) n=25 GD, 50 sex and age matched controls	6 to 18 years	Psychological	Turkey	Turkey	Quantitative
	Barnett et al.	2015	Qualtiative exploration of sexual experiences among adults on the autism spectrum: Implications for sex education	Perspectives on sexual and reproductive health	http://dx.doi.org/10.1363/47e5715	Semi-structured internet-interview, thematic analysis	Sexual identities and experience	24	18 to 61	Psychological/Education	USA	USA	Qualitative
	Bejerot et al.	2014	Sexuality and gender role in autism spectrum disorder: A case control study	PLoS ONE	http://dx.doi.org/10.1371/journal.pone.0087961	Case-control study	Gender role, sexuality and empathizing/Systemising	Total n=103 (ASD=50 (26 male, 24 female) (Control=53 (28 male, 25 female)	20 to 47 years	Psychological	Sweden	Sweden	Quantitative
	Byers et al.	2013	Challenging Stereotypes: Sexual Functioning of Single Adults with High Functioning Autism Spectrum Disorder	Journal of Autism and Developmental Disorders	https://doi.org/10.1007/s10803-013-1813-z	Online Questionnaires	Sexual functioning in HFA/AS	129 (61 male, 68 female)	21 to 73 years	Psychological	International	USA	Quantitative
	Dammasch	2014	A teenager sits still, who would rather be Asperger-autistic than a girl: A clinical relationship report	Analytische Kinder- und Jugendlichenpsychotherapie		Case study	Co-occurence ASD and GD	1	Adolescent	Psychological	Unknown	Germany	Qualitative
	De Vries et al.	2010	Autism spectrum disorders in gender dysphoric children and adolescents	Journal of Autism and Developmental Disorders	http://dx.doi.org/10.1007/s10803-010-0935-9	Cohort study	Incidence	204	7 to 18 years	Psychological	Netherlands	Netherlands	Quantitative
	Dewinter et al.	2017	Sexual Orientation, Gender Identity, and Romantic Relationships in Adolescents and Adults with Autism Spectrum	Journal of Autism and Developmental Disorders	http://dx.doi.org/10.1007/s10803-017-3199-9	Case-control study Survey Questionnaire	Sexual orientation, Gender identity, romantic relationships	Total N=8739, (ASD sample=675 (male 326 female 349), Control sample= 8064	15 to 80	Psychological	Netherlands	Netherlands	Quantitative
	Di Ceglie et al.	2014	Empathising and Systemising in Adolescents with Gender Dysphoria	Opticon	http://dx.doi.org/10.5334/opt.bo	Case-control study (Parent reported)	Empathizing and Systemising in Adolescents with GD	Total N=191 (35 parents of gender dysphoric adolescents (14 male, 21 female, 156 controls	Adolescents	Psychological	UK	UK	Quantitative
	Fisher et al.	2015	Hypersexuality, Paraphilic Behaviors, and Gender Dysphoria in Individuals with Klinefelter's Syndrome	Journal of Sexual Medicine	http://dx.doi.org/10.1111/jsm.13048	Case-control study	Paraphilia, GD, and autistic traits in individuals with Klinefelter's syndrome	Total N=89 (Klinefelter sample=46, control=43)	Above 18	Psychological/Medical	Italy	Italy	Quantitative
	Fleta Zaragozano et al.	2005	Asperger syndrome associated with acrosomia and sexual identity disorder.	Anales de Pediatria	http://dx.doi.org/10.1157/13079820	Case study	Co-occurence ASD and GD	1	Child or Adolescent?	Psychological	Unknown	Spain	Qualitative
	Gallucci et al.	2005	Gender identity disorder in an adult male with Asperger’s syndrome	Sexuality and Disability	https://doi.org/10.1007/s11195-004-2078-4	Case study	interaction Gender identity disorder and Asperger Syndrom	1 (male)	41 years	Psychlogical	USA	USA	Qualitative
	George	2017	Gender identity and sexual orientation in autism spectrum disorder	Autism	https://dx.doi.org/10.1177/1362361317714587	Case-control study Online Survey Questionnaire	Gender dysphoric traits, Autistic traits and sexual orientation	Total=570 (ASD 309, Male=90, Female=219) (Control sample=261, Male=103, Female=158)	ASD mean age=30,20, Control mean age=31.01	Psychological	International	Australia	Quantitative
	George	2018	A Quantitative Analysis of Mental Health Among Sexual and Gender Minority Groups in ASD	Journal of Autism and Developmental Disorders	http://dx.doi.org/10.1007/s10803-018-3469-1	Case-control study Online Survey Questionnaire	Mental health in sexual- and gender -minority groups in ASD	Total=570 (ASD 309, Male=90, Female=219) (Control sample=261, Male=103, Female=158)	ASD mean age=30,20, Control mean age=31.01	Psychological	International	Australia	Quantitative
	Gilmour et al.	2012	Sexuality in a community based sample of adults with autism spectrum disorder	Research in Autism Spectrum Disorders	http://dx.doi.org/10.1016/j.rasd.2011.06.003	Case-control study Online Questionnaires	Sexual attitudes and behaviours in adults with HFA	Total N=364 (ASD=82 Male=55, Female=27, Control=282 Male=102, Female=180)	ASD mean age=28,9, Control mean age=23,2		Canada & USA	Canada	Quantitative
	Heylens et al.	2018	The Co-occurrence of Gender Dysphoria and Autism Spectrum Disorder in Adults: An Analysis of Cross-Sectional and Clinical Chart Data	Journal of Autism and Developmental Disorders	http://dx.doi.org/10.1007/s10803-018-3480-6	Cross sectional and Clinical chart data	Prevalence of autistic traits in a GD population compared to controls	Cross sectional data: Total with GD=63 (male=33, Female=30) Clinical Chart data: Total with GD diagnosis=532 (Male=351, Female=181)	Male mean age=31,3, Female= 22,7 years Only information on cross sectional data		Belgium	Belgium	Quantitative
	Jacobs et al.	2014	Gender Dysphoria and Co-Occurring Autism Spectrum Disorders: Review, Case Examples, and Treatment Considerations	LGBT Health	https://dx.doi.org/10.1089/lgbt.2013.0045	Case study	Co-occurence ASD and GD	2 Males	18 and 29	Psychological	USA	USA	Qualitative
	Janssen et al.	2016	Gender Variance Among Youth with Autism Spectrum Disorders: A Retrospective Chart Review	Transgender Health	https://dx.doi.org/10.1089/trgh.2015.0007	Retrospective Chart data	Co-occurence ASD and GD	Total N=2097 (ASD=492, male=409, Females=83, Norm sample N=1605, Male=851, Female=754)	ASD: 3 to 17 years, Norm sample=6 to 18 years	Psychological	USA	USA	Quantitative
	Jones et al.	2011	Brief Report: Female-To-Male Transsexual People and Autistic Traits	Journal of Autism and Developmental Disorders	http://dx.doi.org/10.1007/s10803-011-1227-8	Case control online Questionnaires	Autistic traits in people with GD	Female to male transsexuals N=61, Male to female transsexuals N=198, Control group from other study N=174 (Male N=76, Female N=98)	16 to 75	Psychological	UK	UK	Quantitative
	Kaltiala-Heino et al.	2015	Two years of gender identity service for minors: Overrepresentation of natal girls with severe problems in adolescent development	Child and Adolescent Psychiatry and Mental Health	http://dx.doi.org/10.1186/s13034-015-0042-y	Cohort study Retrospective Chart data	Adolescent applicants for sex reassignment and mental health	47, all Sex reassignment applicants (Male N=6, Female N=41)	Male mean age=16,04, Female mean age=16,66	Psychological	Finland	Finland	Quantitative and Qualitative
	Kanbayashi	1997	Gender identity disorder of a boy with autistic disorder	Journal of Mental Health		Case-study	Development of gender identity in an intelligent autistic male	1 (ASD Male)	27 years	Psychological	Japan	Japan	Qualitative
	Kobayashi	1991	Psychosexual development of autistic children in adolescence	Japanese Journal of Child and Adolescent Psychiatry		Case study	Psychosexual development of autistic adolescents	8 (ASD)	10 to 17 years	Psychological	Japan	Japan	No info available
	Kraemer et al.	2005	Comorbidity of Asperger syndrome and gender identity disorder	European Child and Adolescent Psychiatry	http://dx.doi.org/10.1007/s00787-005-0469-4	Case study	Co-occurence Asperger syndrome and GD	1 (female)	35	Psychological	Switzerland	Switzerland	Qualitative
	Kristensen et al.	2015	Autistic traits in an Internet sample of gender variant UK adults	International Journal of Transgenderism	http://dx.doi.org/10.1080/15532739.2015.1094436	Cross sectional online questionnaire	Prevalence of trans identities and autistic traits	Total N=446 (13 ASD) (Male N=279, Female N=152 (15 not known)	18 to 75 Years(few above 75)	Psychological	UK and Ireland	UK	Quantitative
	Kuvalanka et al	2017	Perspectives of Mothers of Transgender and Gender-Nonconforming Children With Autism Spectrum Disorder	Journal of Homosexuality	https://dx.doi.org/10.1080/00918369.2017.1406221	Case study Caregiver report	Mothers experience of raising transgender child with ASD	3 mothers of children with ASD	8 to 12 years	Psychological	USA	USA	Qualitative
	Landen et al.	1997	Gender identity disorder in a girl with autism -a case report	European Child and Adolescent Psychiatry	http://dx.doi.org/10.1007/s007870050026	Case study	Co-occurence ASD and GD	1 (Female High Functioning ASD)	14 Years	Psychological	Sweden	Sweden	Qualitative
	Lemaire et al.	2014	Gender identity disorder and autism spectrum disorder in a 23-year-old female	Archives of sexual behavior	https://doi.org/10.1007/s10508-013-0141-x	Case study	Co-occurence ASD and GD	1 (Female ASD and GD	23 years	Psychological	France	France	Qualitative
	May et al.	2017	Gender variance in children and adolescents with autism spectrum disorder from the National Database for Autism Research	International Journal of Transgenderism	http://dx.doi.org/10.1080/15532739.2016.1241976	Case-control study	Gender variance in children and adolescents with ASD	Total N= 1781, Control Sample N=1605 ASD Sample N= 176, (ASD sample SEX Male N=136, Felmale N=33)	6 to 18 Years	Psychological	USA	Australia	Quantitative
	Mukaddes et al.	2002	Gender identity problems in autistic children	Child: Care, Health and Development	http://dx.doi.org/10.1046/j.1365-2214.2002.00301.x	Case study	Co-occurence ASD and GD	2 (Males with HFA)	7 to 10 Years	Psychological	Turkey	Turkey	Qualitative
	Nahata et al.	2017	Mental Health Concerns and Insurance Denials Among Transgender Adolescents	LGBT health	http://dx.doi.org/10.1089/lgbt.2016.0151	Retrospecitve clinical chart data	Mental health and therapy in Transgender adolescents	Total N=79 (ASD total N=5 (Male=3, Female=2)	9 to 18 Years (total sample)	Psychological	USA	USA	Quantitative
	Parkinson	2014	Gender dysphoria in Asperger's syndrome: A caution	Australasian Psychiatry	http://dx.doi.org/10.1177/1039856213497814	Case study	Co-occurence ASD and GD	2 Males	Adults	Psychological	Australia	Australia	Qualitative
	Pasterski et al.	2014	Traits of autism spectrum disorders in adults with gender dysphoria	Archives of sexual behavior	http://dx.doi.org/10.1007/s10508-013-0154-5	Case Control	Co-occurence ASD and GD	Total including Baron-Cohen Control group N=265, GD sample N=91 (Male N=63, Female N=28	Male mean age=45,47, Female mean age=27.38	Psychological	UK	UK	Quantitative
	Perera et al.	2003	Gender identity disorder presenting in a girl with Asperger's disorder and obsessive compulsive disorder	The Ceylon medical journal	http://dx.doi.org/10.4038/cmj.v48i2.3374	Case study	Co-occurence ASD, GD and OCD	1 (Female)	9 years	Psychological	Sri Lanka	Sri Lanka	Qualitative
	Shumer et al.	2016	Evaluation of Asperger Syndrome in Youth Presenting to a Gender Dysphoria Clinic	LGBT health	http://dx.doi.org/10.1089/lgbt.2015.0070	Retrospecitve clinical chart data	Co-occurence Asperger syndrome and GD	39	8 to 20 years	Psychological	USA	USA	Quantitative
	Shumer et al.	2015	Brief Report: Autistic Traits in Mothers and Children Associated with Child's Gender Nonconformity	Journal of Autism and Developmental Disorders	http://dx.doi.org/10.1007/s10803-014-2292-6	Nested case control study and comaprison of SRS scores	Autistic traits in mothers and their children with GD	Nested Case control: ASD group n=19 (12 male, 7 female), Control group n=75 (Male=35, Femle=40), second sampleTotal children with high scores on SRS and GNC N=94 (Male n=47, Female n=47)	30 years	Psychological	USA	USA	Quantitative
	Skagerberg et al.	2015	Brief Report: Autistic Features in Children and Adolescents with Gender Dysphoria	Journal of Autism and Developmental Disorders	http://dx.doi.org/10.1007/s10803-015-2413-x	Case-control study Parent reports	Co-occurence ASD and GD	166	5 to 18 Years	Psychological	UK	UK	Quantitative
	Strang et al.	2017	Transgender Youth Fertility Attitudes Questionnaire: Measure Development in Nonautistic and Autistic Transgender Youth and Their Parents	Journal of Adolescent Health	http://dx.doi.org/10.1016/j.jadohealth.2017.07.022	Interview, self report and parent report	Develop and Test a measure of transgender Fertility attitudes	Study 1: Total N= 25, (Non-autistic n=17, Autistic n=8 (in ASD group Male=2, Female=6). Study 2: Transgender Youth (same group) as in study 1 n=25, Parents n=26	13 to 19	Psychological/Psychometric measurement	USA	USA	Quantitative
	Strang et al.	2014	Increased gender variance in autism spectrum disorders and attention deficit hyperactivity disorder	Archives of sexual behavior	http://dx.doi.org/10.1007/s10508-014-0285-3	Chart review study	Incidence GD, ASD and ADHD	Total N=2159, Control group n=165, Norm on CBCL Sample n=1605, Epilepsy/neurofibromatosis n=116, ADHD n=126, ASD n=147 (ASD group Male n=123, Female=24)	6 to 18 years	Psychological	USA	USA	Quantitative
	Tateno et al.	2011	Gender dysphoria in pervasive developmental disorders	Seishin shinkeigaku zasshi = Psychiatria et neurologia Japonica		Case study	Gender Dysphoria, PDD and AS	4 (PDD and Asperger Syndrome, 3 male, 1 female)	Children /Adolescents	Psychological	Japan	Japan	Qualitative
	Tateno et al.	2008	Comorbid childhood gender identity disorder in a boy with Asperger syndrome	Psychiatry & Clinical Neurosciences	https://dx.doi.org/10.1111/j.1440-1819.2008.01761.x	Case study	Co-occurence ASD and GD	1 (ASD Male)	5 years	Psychlogical	Japan	Japan	Qualitative
	Tateno et al.	2015	Eleven-year follow up of boy with Asperger's syndrome and comorbid gender identity disorder of childhood	Psychiatry & Clinical Neurosciences	https://dx.doi.org/10.1111/pcn.12328	Case study	Follow-up case study (Tatento et al., 2008)	1 (ASD Male)	16 years	Psychological	Japan	Japan	Qualitative
	Tissot	2009	Establishing a sexual identity. Case studies of learners with autism and learning difficulties	Autism	https://doi.org/10.1177/1362361309338183	Case study	Sexual identity and ASD and school	7 (Males n=6, Female n=1)	11 to 19	Educational and Psychological	UK	UK	Qualitative
	van der miesen et al.	2017	Autistic Symptoms in Children and Adolescents with Gender Dysphoria	Journal of Autism and Developmental Disorders	http://dx.doi.org/10.1007/s10803-017-3417-5	Case-control study	Co-occurence ASD and GD	Total N=3193 (GD group n=490 male n=248, Female n=242, ASD group n=196, Male n=100, Female n=96, Control group n=2507 Male n=1248, Female n=1259)	Mean age GD group=11,1 years, ASD group=10,8 years, Controls=10,2 years	Psychological	Netherlands	Netherlands	Quantitative
	VanderLaan et al.	2015	Autism Spectrum Disorder Risk Factors and Autistic Traits in Gender Dysphoric Children	Journal of Autism and Developmental Disorders	http://dx.doi.org/10.1007/s10803-014-2331-3	Clinical chart data	ASD traits and risk factors in GD children	GD sample of N=49 (male n=40, Female n=9)	Mean age= 7,19	Psychological	Canada	Canada	Quantitative
	*VanderLaan et al.	2015	Do children with gender dysphoria have intense/obsessional interests?	Journal of sex research	http://dx.doi.org/10.1080/00224499.2013.860073	Case-control study	Obsessional interests	*Correction from Øien et al. (2018): Total N=3355 (Gender-referred n=534 (male=439, female=95, Siblings control group n=419 (male=241, female=178), Reference Control group n=2402 (referred males=582, non-referred males=582, referred females=619, non-referred females=619))	3 to 12 years	Psychological	Canada	Canada	Quantitative
	Williams et al.	1996	Case study: Cross-gender preoccupations in two male children with autism	Journal of Autism and Developmental Disorders	http://dx.doi.org/10.1007/BF02172352	Case Study	Cross-gender preoccupation in ASD	2 (Male)	3 to 5 years	Psychological	USA	USA	Qualitative
	Zucker et al.	2017	Intense/obsessional interests in children with gender dysphoria: A cross-validation study using the Teacher's Report Form	Child and Adolescent Psychiatry and Mental Health	http://dx.doi.org/10.1186/s13034-017-0189-9	Teacher reports evaluation of psychometric properties	Obsessional interests in GD children	Total GD n=386 (Male=304, Female=82)	Mean age=7.77	Psychologcical psychometric properties	Canada	Canada	Quantitative
Updated Review 24.09.2018
ID	AUTHORS	YEAR	TITLE	JOURNAL	DOI	METHOD AND STUDY DESIGN	MAIN FOCUS	TOTAL PARTICIPANTS	AGE GROUP IN FOCUS	MAIN FIELD/PERSPECTIVE	Participant COUNTRY	STUDY COUNTRY OF ORIGIN	QUANTITATIVE/QUALITATIVE
	Cooper et al.	2018	Gender identity in autism:Sex differences in social affiliation with gender groups	Journal of Autism and Developmental Disorders	https://doi.org/10.1007/s10803-018-3590-1	Group comparison factorial design	Sex differences in feelings of gender identity in people with ASD	Total N=486 (ASD group n=118 males, n=101 females) (Control group n=114 Typically developing males, n=153 typically developing females)	16 to 80	Psychological	Unknown	UK	Quantitative
	Kuvalanka et al.	2018	Perspectives of mothers of transgender and gender nonconforming children with autism spectrum disorder	Journal of Homosexuality	https://doi.org/10.1080/00918369.2017.1406221	Telephone Interview at two time-points	Mothers experiences and thoughs about raising a transgender and non-comforming child with ASD	3 mothers Transgender and Gender-noncomforming children with ASD (from a sample of 49 parents with transgender and gender-noncomforming children)	Mothers' age (m=43.7) Child age =8, 8 and 12 at t1)	Psychological	USA	USA	Qualitative
	Nobili et al.	2018	Autistic traits in tratment-seeking transgender adults	Journal of Autism and Developmental Disorders	https://doi.org/10.1007/s10803-018-3557-2	Case-control study	autistic traits in transgender population attending transgender health services compared to matched controls	Final analyses: Transgender group n=656 (male=396, female=260) Cisgender group n=656 (male=396, female=260) Recruitment before final analyses: Total N=4731 (Transgender group n=661	Above 17 years (mean age both groups= 28.25	Psychological	UK	UK	Quantitative
	Strang et al.	2018	"The thought it was an obsession": Trajectories and perspectives of autistic transgender and gender-diverse adolsecents	Journal of Autism and Developmental Disorders	https://doi.org/10.1007/s10803-018-3723-6	Interview	Perspective from an autistic transgender and gender diverse view on their own experiences	22 autistic gender-diverese adolescents (Transgender male=6, transgender female=14, gender non-binary=2	mean age= 16.6	Psychological	USA	USA	Qualitative
	van der Miesen et al.	2018	Prevalence of the wish to be of the opposite gender in adolescents and adults with autism spectrum disorder	Archives of Sexual Behavior	https://doi.org/10.1007/s10508-018-1218-3	Case-control comparisons of groups through a battery of questionnaires	Adolescents and adults wish to be of opposite gender	Total N=3242, Adoescents: ASD group n=573 (male=469, female=104) Control/standardization sample n=1016 non-reffered adolescents (male n=495, female n=521). Adults: ASD group n=807 (male=616, female=191), comparison group n=846 non reffered adults (male=381, female=465)	Adolescent group: ASD group Mean age=15.98 yrs, control group 11 to 18 yrs. Adult group: ASD group mean age=32.14, control group mean age=29.9 yrs	Psychological	Netherlands	Netherlands	Quantitative
	Walsh et al.	2018	Brief report: Gender identity differences in autistic adults: associations with perceptual and socio-cognitive profiles	Journal of Autism and Developmental Disorders	https://doi.org/10.1007/s10803-018-3702-y	Questionnaires including self-reports	Gender identity development in Autistic people	Total N=669 all with an ASD-diagnosis. (male n=322, female n=347)	Mean age= 44.67 (range 15.92-80.14)	Psychological	Netherlands	Netherlands	Quantitative
